# Supplementary material for: Improved method for linear carbon monoxide simulation and source attribution in atmospheric chemistry models illustrated using GEOS-Chem v9
Source: Copernicus journal article supplement (doi:10.5194/gmd-2017-94), 2017-05-03
Supplement: Supplementary file 1 [file gmd-2017-94-supplement.pdf]

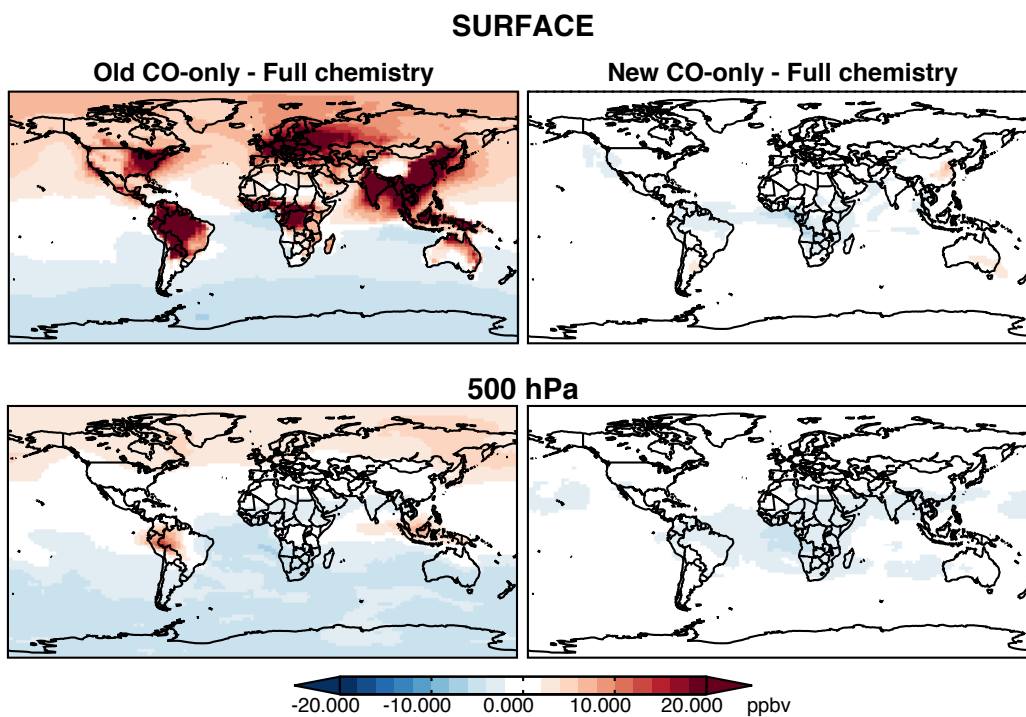

**Fig. S1.** Same as Figure 1, but for January 2009 to highlight seasonal variability. For other months and years, see full benchmark results at [https://issuu.com/jennyfisher\\_uow/stacks](https://issuu.com/jennyfisher_uow/stacks) .

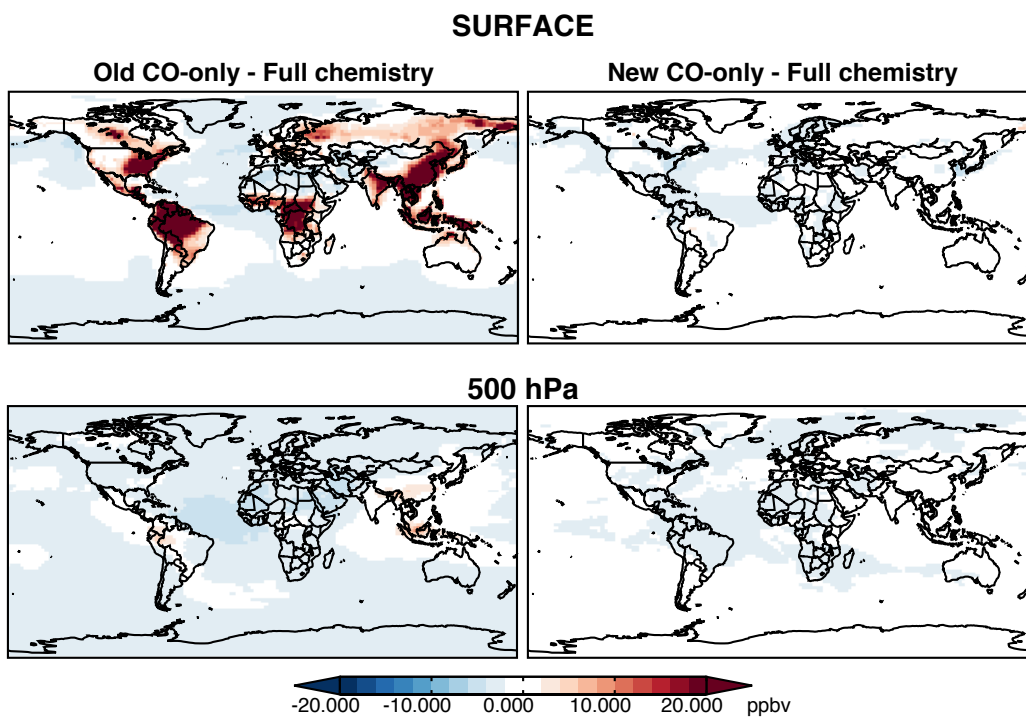

**Fig. S2.** Same as Figure 1, but for July 2010 to highlight interannual variability. For other months and years, see full benchmark results at [https://issuu.com/jennyfisher\\_uow/stacks](https://issuu.com/jennyfisher_uow/stacks) .

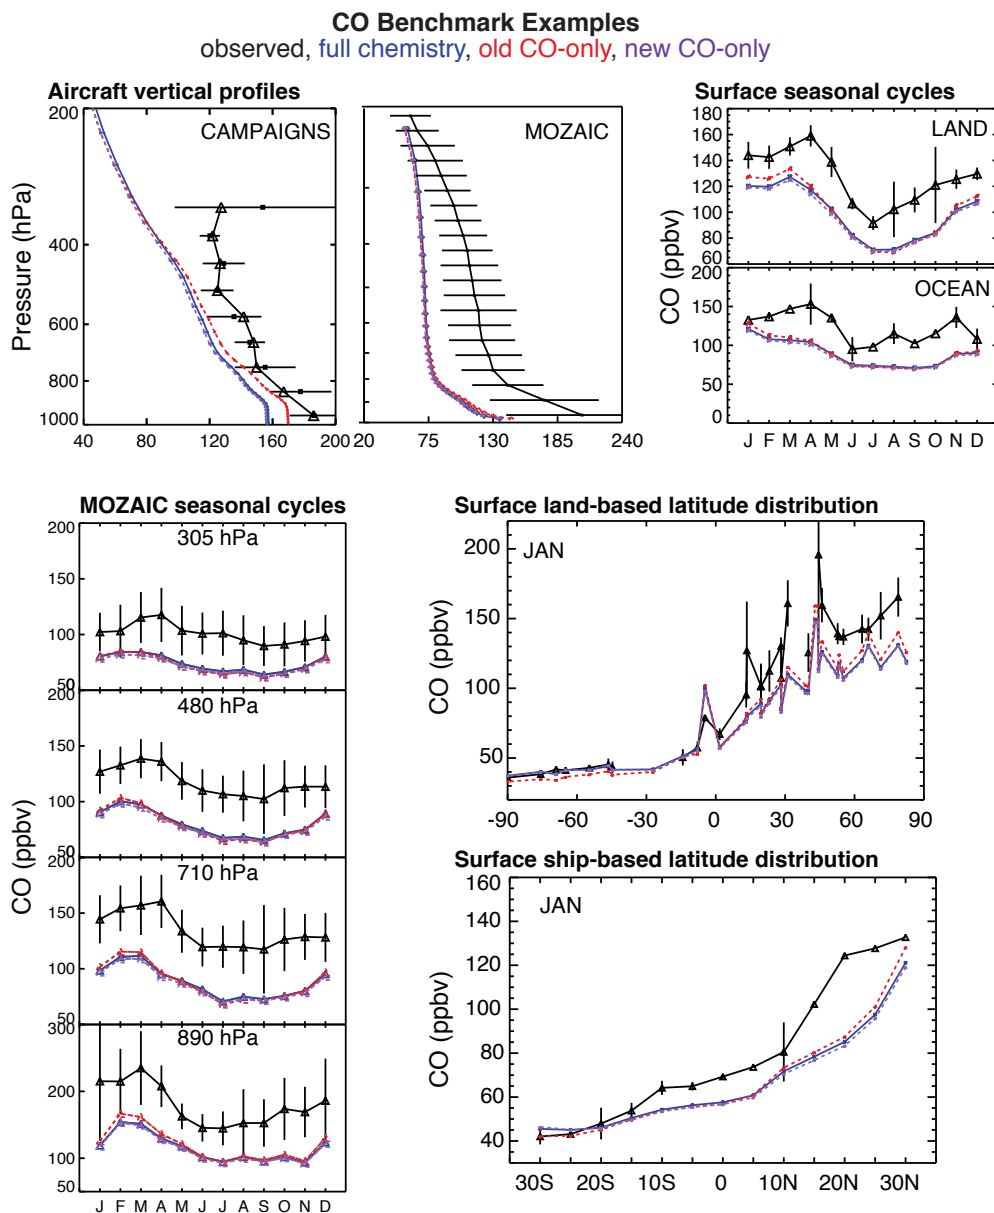

**Fig. S3.** Representative examples of the plot types produced by the GEOS-Chem CO benchmark evaluation. Plot types include: aircraft vertical profiles (top left), both from short-term campaigns and from MOZAIC data separated by seasons; aircraft seasonal cycles (bottom left) from MOZAIC data separated by altitude; surface seasonal cycles (top right) from NOAA GMD land and ocean sites; and surface latitude distributions (bottom right) from a subset of land-based and ship-based NOAA GMD sites. For the full set of benchmark plots, see [https://issuu.com/jennyfisher\\_uow/stacks](https://issuu.com/jennyfisher_uow/stacks).

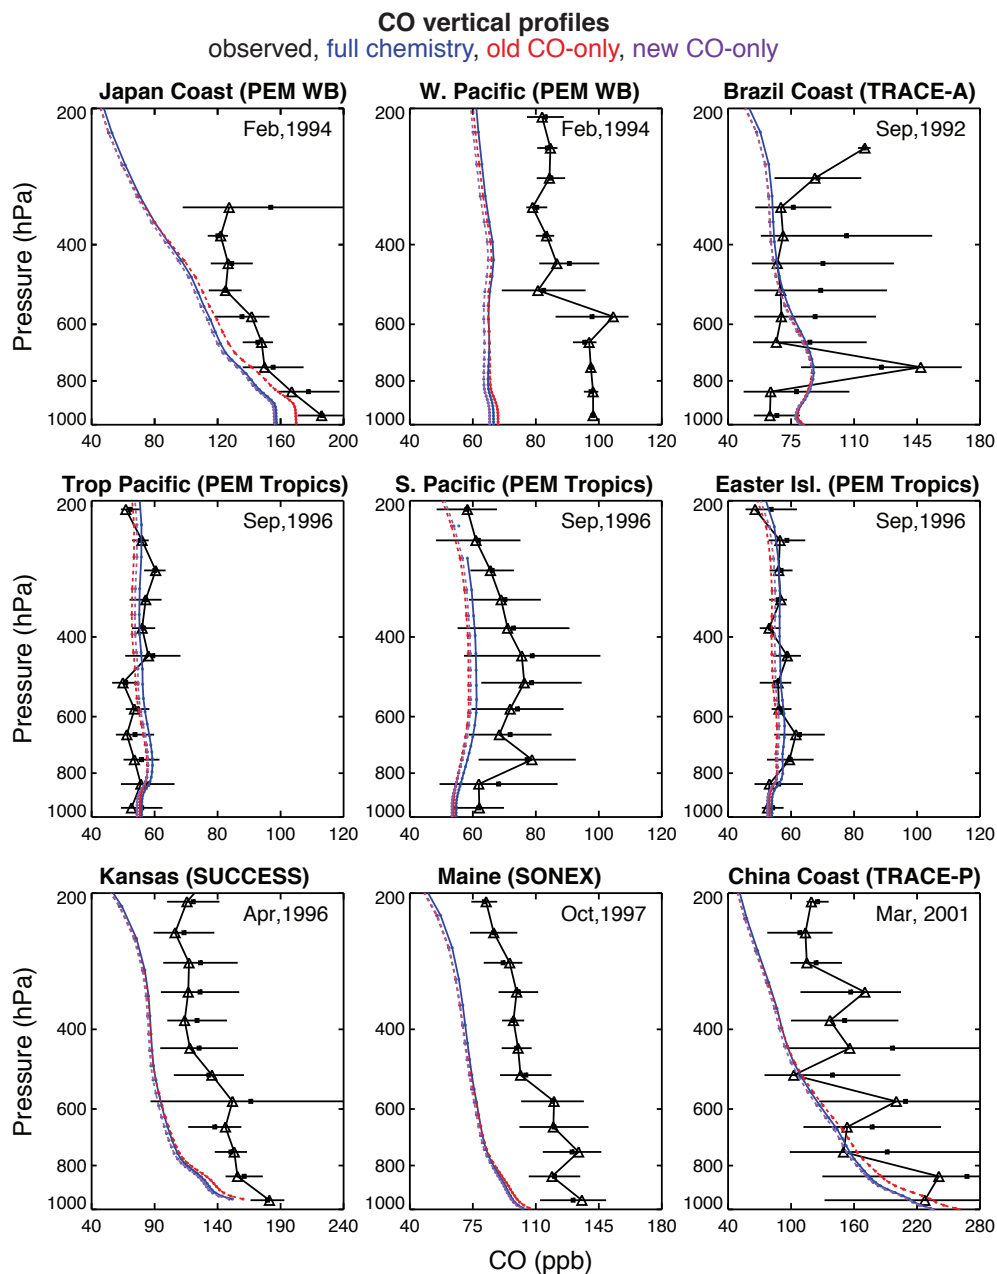

**Fig. S4.** Same as Figure 5, but for additional aircraft data available in the GEOS-Chem benchmark. Additional campaigns and regions can be seen at [https://issuu.com/jennyfisher\\_uow/stacks](https://issuu.com/jennyfisher_uow/stacks).

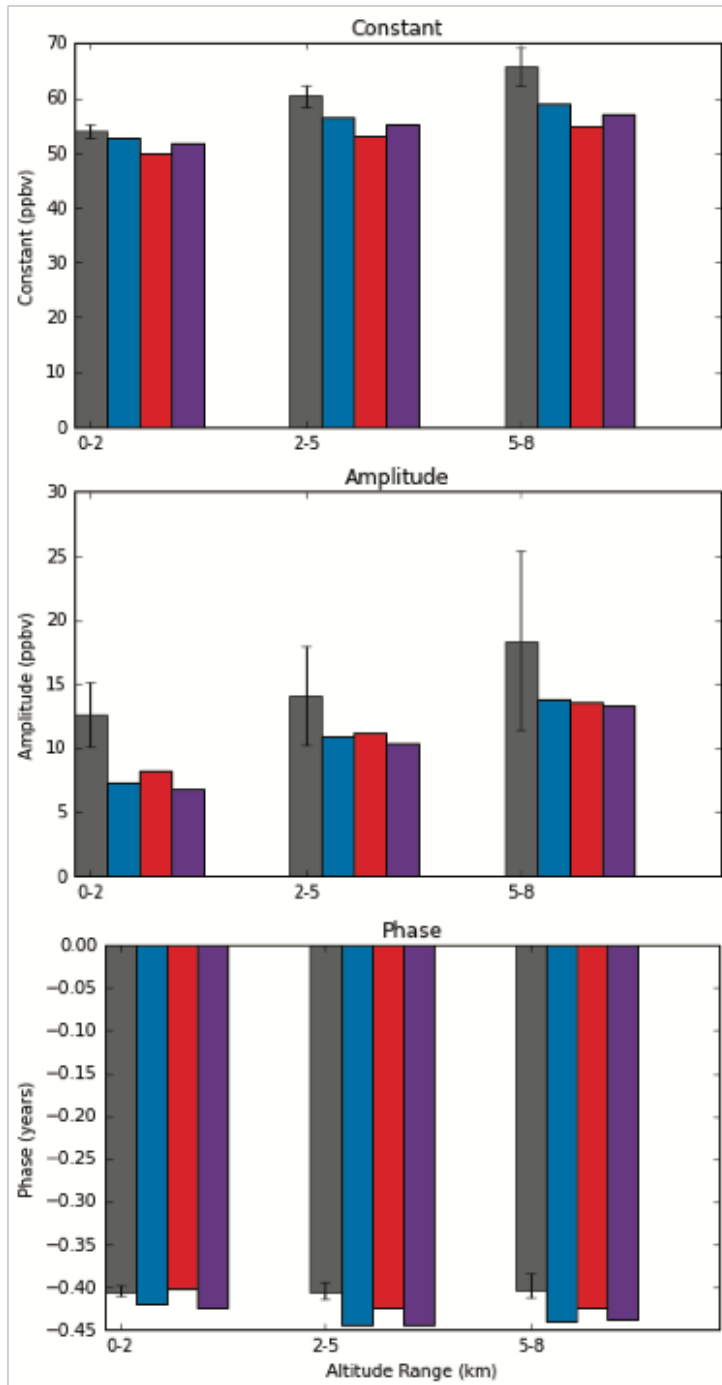

**Fig. S5.** Parameters for a single harmonic fit describing the shape of the seasonal cycle of carbon monoxide in the remote southern hemisphere (in/around Cape Grim, Australia) in different altitude bins. Grey bars represent the fit to the observations (including 95% confidence intervals) and coloured bars represent the GEOS-Chem full chemistry (blue), original CO-only (red) and updated CO-only (purple) simulations. For full details of the method and motivation of the fit, see Fisher et al. (2015).

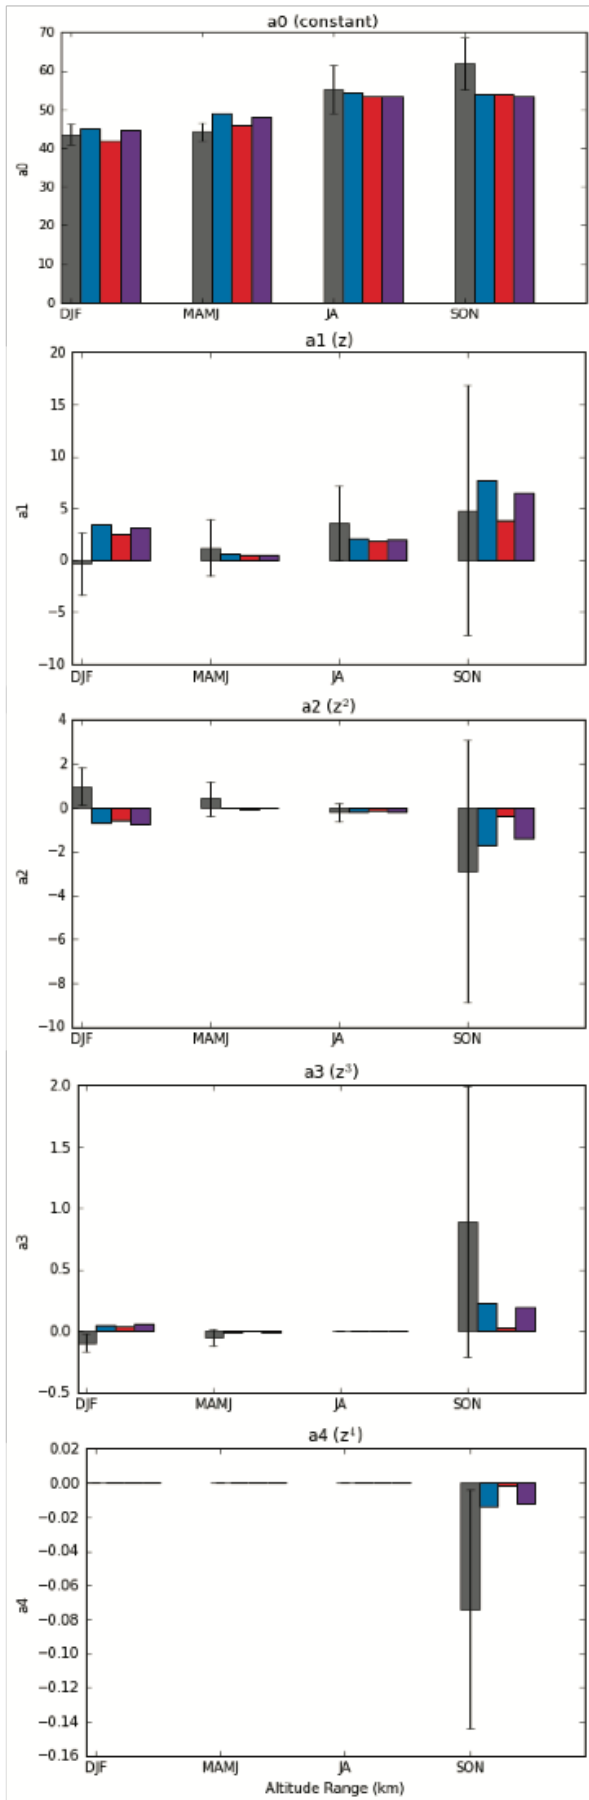

**Fig. S6.** Polynomial terms representing the shape of the vertical profile of carbon monoxide in the remote southern hemisphere (in/around Cape Grim, Australia) in different seasons. Grey bars represent the fit to the observations (including 95% confidence intervals) and coloured bars represent the GEOS-Chem full chemistry (blue), original CO-only (red) and updated CO-only (purple) simulations. For full details of the method and motivation of the fit, see Fisher et al. (2015).
